# Supplementary material for: A novel strategy to construct high performance lithium-ion cells using one dimensional electrospun nanofibers, electrodes and separators
Source: Royal Society of Chemistry journal article supplement (doi:10.1039/c3nr04486f), 2013-01-01
Supplement: c3nr04486f.pdf [file c3nr04486f.pdf]

Supplementary information

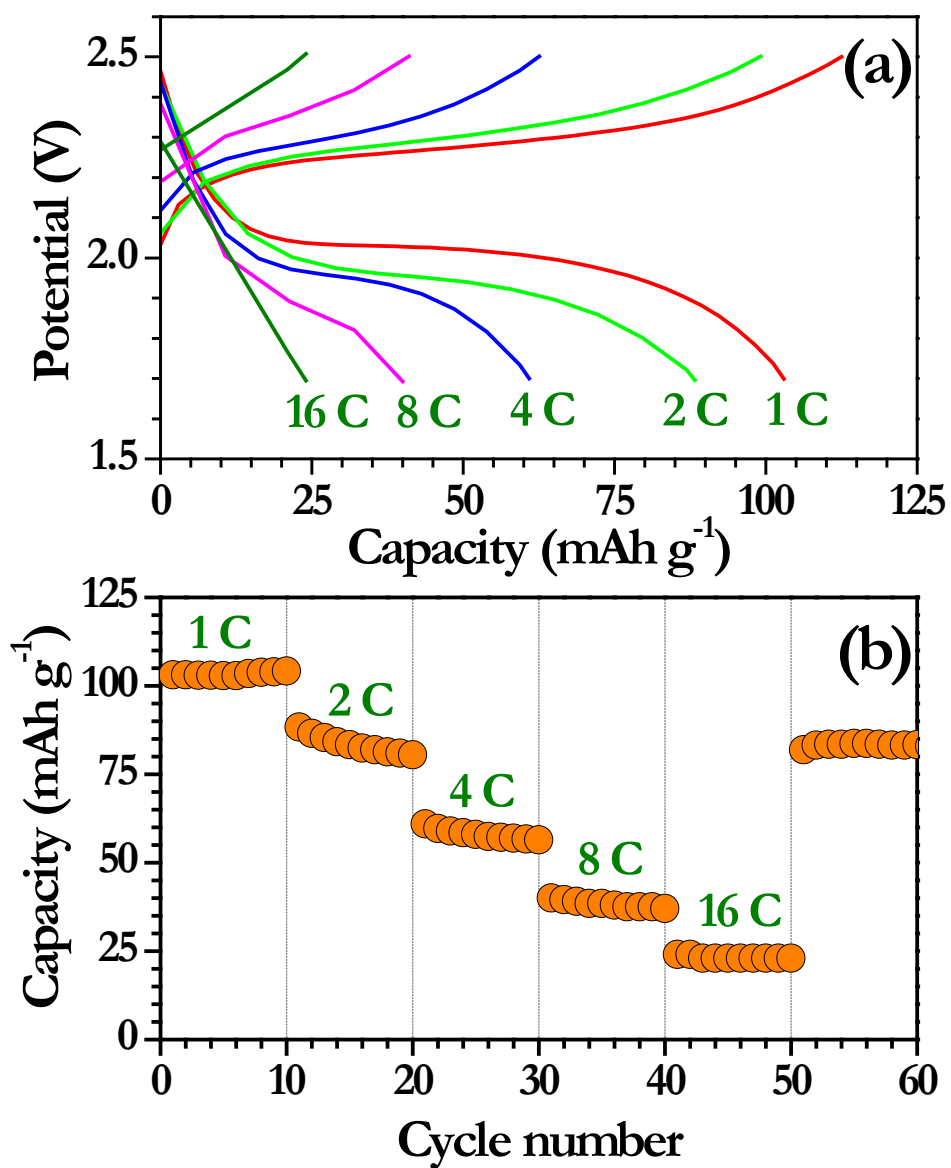

**Figure S1.** (a) Typical galvanostatic charge-discharge curves of all electrospun  $\text{LiMn}_2\text{O}_4/\text{TiO}_2$  full-cell assembly cycled between 1.7-2.5 V at various C rates. Here, 1 C is assumed to be  $150 \text{ mAh g}^{-1}$ . (b) Rate capability studies of all electrospun  $\text{LiMn}_2\text{O}_4/\text{TiO}_2$  cells
